# Supplementary material
Source: Springer Nature journal article supplement (https://www.springermedizin.de/resource/supplementary/13048_2010_58_MOESM8_ESM.pdf/9664802)

Events

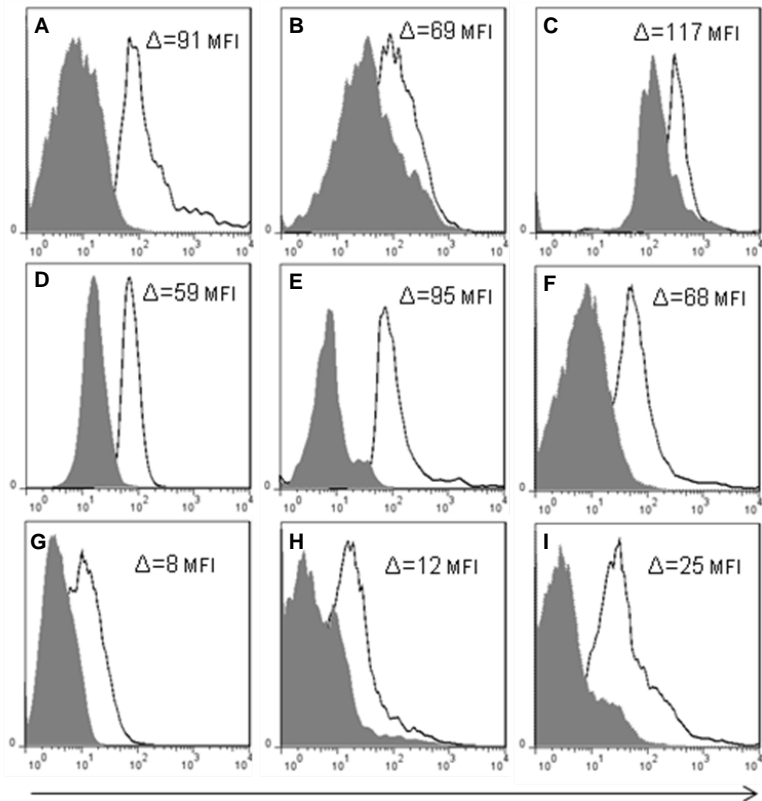

ALDH (Intensity)

Supplement: MOESM8 [file 9664802]
